# Supplementary material
Source: MDPI journal article supplement (https://www.mdpi.com/2075-1702/12/2/141)
Supplement: s1 [file s1]

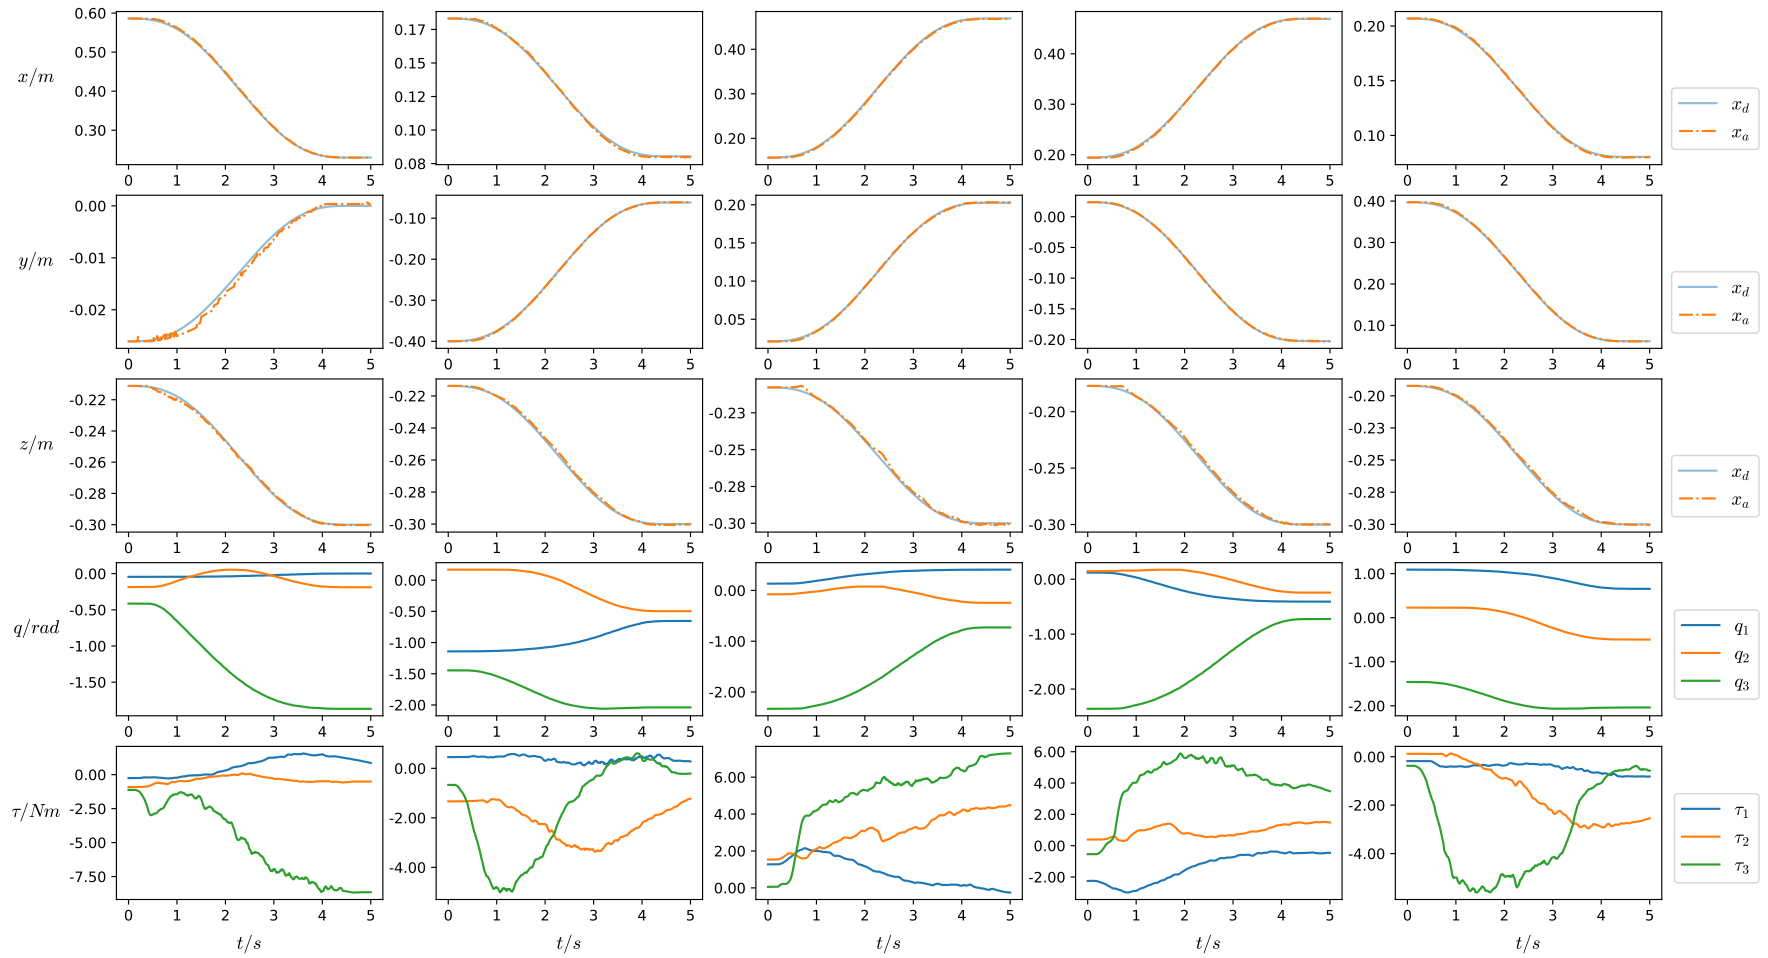

Supplementary Figure S1: Collection of graphs during an example whole body spider movement on the test wall. The columns represent the legs from 1 to 5. Rows 1-3 show the x,y, and z - coordinates of the end-effector during the movement. Row 4 shows the angles in joints during the movement. Row 5 shows torques in joints during the movement.
